# Supplementary material for: CDK5 Functions as a Tumor Promoter in Human Lung Cancer
Source: PubMed Central journal article supplement — J Cancer. 2018 Oct 10;9(21):3950–61. doi: 10.7150/jca.25967 (PMC6218768; doi:10.7150/jca.25967), 2018-10-10

## **Title Page**

### **Title: Systematic Analysis of Gene Alterations and Clinical Outcome of Cyclin-Dependent Kinase 5 in Lung Cancer**

Authors' names: Jie Zeng<sup>1#</sup>, Shuanshuan Xie<sup>1#</sup>, Yang Liu<sup>1</sup>, Changxing Shen<sup>1</sup>, Xiaolian Song<sup>1</sup>, Guo-Lei Zhou<sup>2, 3</sup>, Changhui Wang<sup>1\*</sup>

Authors' affiliations:

<sup>1</sup>Department of Respiratory Medicine, Shanghai Tenth People's Hospital, Tongji University, Shanghai 200072, PR China;

<sup>2</sup>Department of Biological Sciences, Arkansas State University, State University, AR 72467, USA;

<sup>3</sup>Molecular Biosciences Program, Arkansas State University, State University, AR 72467, USA.

<sup>#</sup> These authors have contributed equally to this work.

Correspondence to: Changhui Wang, No.301, Mid Yanchang Rd, Department of Respiratory Medicine, Shanghai Tenth People's Hospital, Tongji University, Shanghai, China, 200072.

Email: wang-chang-hui@hotmail.com

Fax number: 86-021-66301685, Telephone: 86-021-66301685

**Supplementary Table 1: CDK5 expression in cancers**

| Cancer               | Cancer subtype                                        | P-value   | Fold change | Rank (10%) | Sample | Reference |
|----------------------|-------------------------------------------------------|-----------|-------------|------------|--------|-----------|
| <b>Bladder</b>       | Superficial bladder                                   | 1.85E-18  | 7.511       | 10         | 76     | [55]      |
|                      | Infiltrating bladder                                  | 2.56E-7   | 2.718       | 10         | 129    | [55]      |
| <b>Brain and CNS</b> | Anaplastic Oligoastrocytoma                           | 4.78E-5   | -3.614      | 10         | 10     | [56]      |
|                      | Glioblastoma                                          | 5.63E-6   | -3.247      | 10         | 31     | [56]      |
|                      | Astrocytoma                                           | 9.31E-5   | -2.186      | 10         | 51     | [57]      |
|                      | Anaplastic Astrocytoma                                | 7.87E-8   | -2.627      | 10         | 42     | [58]      |
|                      | Oligodendroglioma                                     | 1.28E-9   | -2.869      | 10         | 73     | [58]      |
| <b>Breast</b>        | Invasive Ductal and Invasive Lobular Breast Carcinoma | 9.17E-49  | 2.108       | 10         | 234    | [59]      |
|                      | Breast Carcinoma                                      | 1.22E-10  | 2.023       | 10         | 158    | [59]      |
|                      | Mucinous Breast Carcinoma                             | 1.66E-25  | 2.246       | 10         | 190    | [59]      |
|                      | Tubular Breast Carcinoma                              | 1.27E-35  | 2.007       | 10         | 214    | [59]      |
|                      | Medullary Breast Carcinoma                            | 1.30E-35  | 2.107       | 10         | 176    | [59]      |
|                      | Invasive Ductal Breast Carcinoma                      | 1.73E-102 | 2.156       | 10         | 1700   | [59]      |
|                      | Lobular Breast Carcinoma                              | 3.03E-10  | 2.449       | 10         | 22     | [60]      |
|                      | Invasive Ductal Breast Carcinoma                      | 2.37E-11  | 2.435       | 10         | 37     | [60]      |
|                      | Invasive Breast Carcinoma                             | 1.70E-9   | 2.094       | 10         | 158    | [61]      |

|                      |                                    |          |        |    |     |      |
|----------------------|------------------------------------|----------|--------|----|-----|------|
|                      | Invasive Ductal Breast Carcinoma   | 1.85E-40 | 2.166  | 10 | 450 | [62] |
| <b>Colorectal</b>    | Rectal Adenocarcinoma              | 5.39E-34 | 2.451  | 10 | 130 | [63] |
|                      | Colon Adenoma                      | 1.54E-10 | 2.059  | 10 | 57  | [64] |
| <b>Head and Neck</b> | Tongue Squamous Cell Carcinoma     | 2.36E-14 | 4.819  | 10 | 57  | [65] |
| <b>Leukemia</b>      | Hairy Cell Leukemia                | 7.07E-10 | -3.125 | 10 | 41  | [66] |
| <b>Liver</b>         | Hepatocellular Carcinoma           | 3.54E-20 | -2.418 | 10 | 179 | [67] |
| <b>Lymphoma</b>      | Diffuse Large B-cell Lymphoma      | 3.44E-6  | 2.666  | 10 | 57  | [66] |
|                      | Centroblastic Lymphoma             | 2.49E-8  | 3.170  | 10 | 53  | [66] |
|                      | Anaplastic Large Cell Lymphoma     | 1.36E-5  | 3.920  | 10 | 26  | [68] |
|                      | Angioimmunoblastic T-cell Lymphoma | 5.12E-5  | 2.196  | 10 | 26  | [68] |
| <b>Melanoma</b>      | Cutaneous Melanoma                 | 4.05E-5  | 21.456 | 10 | 52  | [69] |
| <b>Ovarian</b>       | Ovarian Serous Adenocarcinoma      | 2.16E-5  | 2.040  | 10 | 53  | [70] |
| <b>Other</b>         | Seminoma, NOS                      | 4.91E-8  | 2.318  | 10 | 18  | [71] |
|                      | Yolk Sac tumor, NOS                | 9.49E-6  | 2.306  | 10 | 15  | [71] |
|                      | Uterine Corpus Leiomyoma           | 7.97E-5  | 2.498  | 10 | 77  | [72] |

**Supplementary Table 2**

| <b>Dataset</b>     | <b>GSE19234</b>  | <b>E-TABM-346</b> | <b>jacob-00182-MSK</b> | <b>GSE31210</b>    |
|--------------------|------------------|-------------------|------------------------|--------------------|
| <b>Cancer type</b> | Skin cancer      | Blood cancer      | Lung cancer            | Lung cancer        |
| <b>Subtype</b>     | Melanoma         | DLBCL             | Adenocarcinoma         | Adenocarcinoma     |
| <b>Number</b>      | 38               | 53                | 104                    | 204                |
| <b>Endpoint</b>    | Overall survival | Overall survival  | Overall survival       | Overall survival   |
| <b>Event 0</b>     | 19               | 23                | 65                     | 174                |
| <b>Event 1</b>     | 19               | 30                | 39                     | 30                 |
| <b>Female</b>      | 14               | 26                | 67                     | 109                |
| <b>Male</b>        | 24               | 27                | 37                     | 95                 |
|                    | Stage III A: 4   | Grade 2: 10       | Score N 1: 64          | Stage IA: 109      |
|                    | Stage III B: 18  | Grade 3: 26       | Score N 2: 20          | Stage IB: 53       |
|                    | Stage III A: 11  | Grade 4: 9        | Score N 3: 20          | Stage II: 42       |
|                    | Stage IV: 5      | Grade 5: 8        | Score T 1: 33          | ALK-Fusion: 7      |
|                    |                  |                   | Score T 2: 67          | EGFR-Mutation: 116 |
|                    |                  |                   | Score T 3: 4           | EGFR/KRAS/ALK-:62  |
|                    |                  |                   |                        | KRAS Mutation: 19  |
|                    |                  |                   |                        | MYC High: 16       |
|                    |                  |                   |                        | MYC Low: 187       |
|                    |                  |                   |                        | MYC ND: 1          |
|                    |                  |                   |                        | Ever-Smoker: 99    |
|                    |                  |                   |                        | Never-Smoker: 105  |

**Supplementary Figure 1. CDK5 promoted the proliferation ability of lung cancer cells in vitro.** (A) MTT experiment was performed in PC9 cells transfected with NC siRNA or CDK5 siRNA. Error bars represent the mean  $\pm$  s.d. of three independent experiments. (B) The growth inhibitory rate of PC9 after treated with roscovitine at the concentration for 20um, 40um, 60um. Error bars represent the mean  $\pm$  s.d. of three independent experiments. (D) Colony-formation assay was used for detecting the proliferation ability in PC9 cells after treated with roscovitine. (#  $p < 0.05$ ; \*  $p < 0.01$ ; \*\*  $p < 0.001$ ).

**Supplementary Figure 2. CDK5 promoted lung cancer cell migration in vitro.** (A) Transwell assay was performed in PC9 cells transfected with NC siRNA and CDK5 siRNA. NC: Normal control, S1: siRNA1, S2: siRNA2. (B) Wound healing assay was performed in PC9 cells after treated with roscovitine at the concentration of 20um or 40um. Error bars represent the mean  $\pm$  s.d. of three independent experiments. (#  $p < 0.05$ ; \*  $p < 0.01$ ; \*\*  $p < 0.001$ ).

**Supplementary Figure 1**

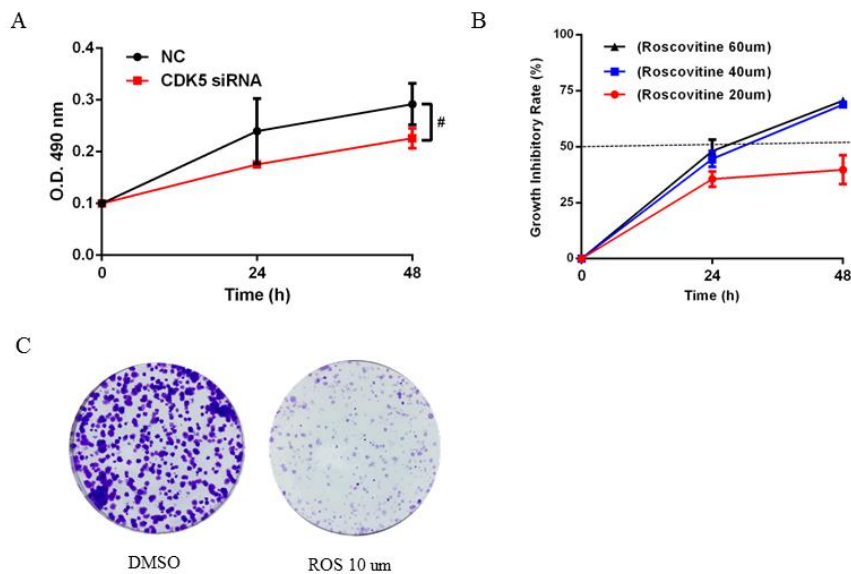

**Supplementary Figure 2**

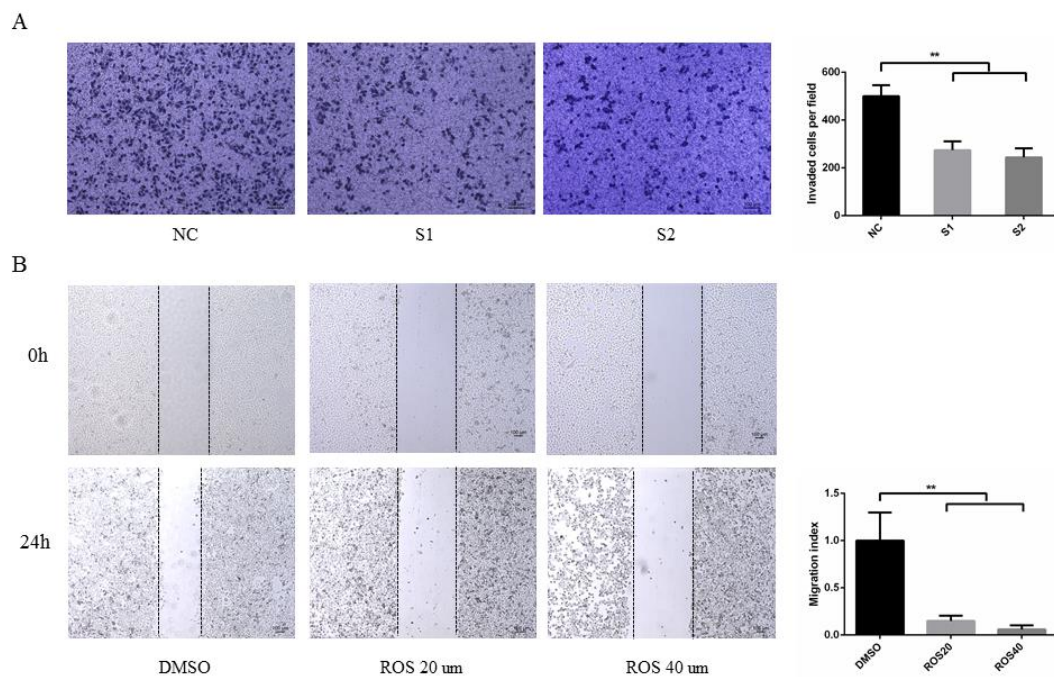

Supplement: jcav09p3950s1.pdf [file jcav09p3950s1.pdf]
